1 **Estimating the long-term health impact of nicotine exposure by dissecting the effects of**  
2 **nicotine versus non-nicotine constituents of tobacco smoke:**

3 **A multivariable Mendelian randomisation study**

4 Khouja, J. N.<sup>1,2\*</sup>, Sanderson, E.<sup>2,3</sup>, Wootton, R.E.<sup>1,2,6</sup>, Taylor, A. E.<sup>2,3</sup>, Church, B. A.<sup>5</sup>,  
5 Richmond, R. C.<sup>2,3</sup> & Munafo, M. R.<sup>1,2,4</sup>

6 <sup>1</sup> School of Psychological Science, University of Bristol, Bristol, United Kingdom, BS8 1TU

7 <sup>2</sup> Medical Research Council Integrative Epidemiology Unit, University of Bristol, Bristol, UK,  
8 BS8 2BN

9 <sup>3</sup> Population Health Sciences, Bristol Medical School, University of Bristol, Bristol, UK, BS8  
10 2BN

11 <sup>4</sup> NIHR Bristol Biomedical Research Centre, Bristol, UK, BS8 2BN

12 <sup>5</sup> School of Psychology and Vision Sciences, University of Leicester, UK, LE1 7HA

13 <sup>6</sup> Nic Waals Institute, Lovisenberg diakonale sykehus, Oslo, Norway, 0456

14

15 \*Corresponding author

16 Email: [jasmine.khouja@bristol.ac.uk](mailto:jasmine.khouja@bristol.ac.uk)

17

18 Short title: Health effects of nicotine versus non-nicotine constituents of tobacco smoke

19  
20  
21  
22  
23  
24  
25  
26  
27  
28  
29  
30  
31  
32  
33  
34  
35  
36  
37

## Abstract

The detrimental health effects of smoking are well-known, but the impact of long-term nicotine use without exposure to the other constituents of tobacco is less clear. Given the increasing long-term use of alternative nicotine delivery systems, such as e-cigarettes, it is increasingly important to understand and separate the effects of long-term nicotine use from the impact of tobacco smoke exposure. Using a multivariable Mendelian randomisation framework, we explored the direct effects of nicotine compared with the non-nicotine constituents of tobacco smoke on health outcomes (lung cancer, chronic obstructive pulmonary disease [COPD], forced expiratory volume in one second [FEV-1], forced vital capacity [FVC], coronary heart disease [CHD], and heart rate [HR]). The results suggest that these smoking-related outcomes are not due to nicotine exposure but are caused by the other components of tobacco smoke; however, there are multiple potential sources of bias, and the results should be triangulated using evidence from a range of methodologies.

38 Although the detrimental health effects of smoking are well known [1], it is less clear which  
39 individual components of cigarette smoke – such as nicotine – drive these effects. In recent  
40 years, it has become increasingly important to fill this knowledge gap, given the increase in  
41 the popularity of alternative nicotine delivery systems, in particular e-cigarettes [2]. E-  
42 cigarettes are often used by smokers to stop smoking and are generally used for longer  
43 periods than conventional cessation aids which also contain nicotine (e.g., nicotine patches)  
44 [3, 4]. Although *short-term* use of nicotine without the remaining constituents of tobacco  
45 smoke is relatively harmless, the *long-term* harms of nicotine use are poorly understood [5].  
46 Given many smokers choose to use e-cigarettes to reduce their risk of poor health outcomes  
47 [2], and that e-cigarettes can be used with or without nicotine, smokers and e-cigarette  
48 users need causal evidence regarding the possible health outcomes related to long-term  
49 nicotine use to make informed decisions regarding their e-cigarette use.

50

51 Randomised controlled trials (RCT) are often employed to explore causal relationships [6],  
52 but an RCT would be unethical and impractical in this scenario – non-smokers would need to  
53 be unnecessarily exposed to nicotine for decades to understand the (potentially harmful)  
54 long-term effects of nicotine use without confounding from exposure to cigarette smoke.  
55 Mendelian randomisation (MR) is an alternative method which can be used in scenarios  
56 where RCTs are implausible or unethical. MR uses genetic variants associated with the  
57 exposure of interest to serve as instrumental variables to estimate the effect of that  
58 exposure on a particular outcome [7, 8]. Nonetheless, they require well powered genome-  
59 wide association studies (GWAS) to identify such genetic variants. There are currently no  
60 available GWAS of e-cigarette use or nicotine exposure without exposure to tobacco.

61 Furthermore, there are insufficient data available to conduct a well-powered GWAS. Novel  
62 methods are therefore required to explore this research question.

63

64 Multivariable MR (MVMR) is an extension of MR that can be used to explore the direct  
65 effect of one exposure on an outcome while accounting for the effect of another  
66 (potentially correlated) exposure or exposures [9]. The method is robust to pleiotropic  
67 effects of the single nucleotide polymorphisms (SNPs) used as instruments through the  
68 other exposures included in the model. As large-scale GWAS have identified SNPs that are  
69 associated with smoking heaviness [10] (i.e., the number of cigarettes a person smokes per  
70 day) and the nicotine metabolite ratio (i.e., how quickly a person metabolises nicotine – see  
71 below) [11] among smokers, we can employ this method to explore the effect of nicotine on  
72 selected health outcomes. Rather than exploring the total effect of smoking on a health  
73 outcome (which includes the effect of nicotine), this method allows us to separate the direct  
74 effect of nicotine versus the other constituents of tobacco smoke.

75

76 However, direct measurement of nicotine is difficult. Metabolites of nicotine such as  
77 cotinine (a direct metabolite) and 3’hydroxycotinine (3HC; a metabolite of cotinine) are  
78 often used as objective measures to proxy for nicotine given the short half-life of nicotine  
79 itself [12] (Supplementary Figure S1). Cotinine and cotinine plus 3HC are highly specific  
80 biomarkers, but both are impacted by metabolism (which can differ between individuals).  
81 The nicotine metabolite ratio (NMR), is a measure of how quickly a person metabolises  
82 nicotine (3’hydroxycotinine/cotinine) and therefore causally impacts the amount of nicotine  
83 in a person's body given a set amount of nicotine exposure [13]. Figure 1 illustrates that a  
84 smoker with a higher NMR (Person A) will have less circulating nicotine in their body than a

85 smoker with a lower NMR (Person B) given the same level of nicotine exposure; however,  
86 because smokers with a higher NMR clear nicotine quickly from their system, this often  
87 results in them smoking more cigarettes per day (CPD) [14]. In a standard MR model with  
88 NMR as an exposure, the result may be ambiguous as it could reflect the effect of higher  
89 nicotine exposure resulting from increased smoking heaviness or lower nicotine exposure  
90 resulting from faster metabolism. In contrast, when both NMR and CPD are included in an  
91 MVMR model (Figure 2), the analysis is analogous to a fixed access experiment in which the  
92 amount of smoke exposure / cigarettes smoked is fixed and the effect of nicotine exposure  
93 per cigarette smoked can be assessed. Therefore, in an MVMR framework accounting for  
94 genetic predisposition to CPD, the results should dissect the direct effect of nicotine levels  
95 per cigarette smoked from the direct effect of the other constituents of tobacco smoke,  
96 whereby an increase in NMR reflects lower exposure to nicotine (Figure 1).

97

98

99 Figure 1. Illustration of the impact of the nicotine metabolite ratio on circulating nicotine  
100 and smoking heaviness.

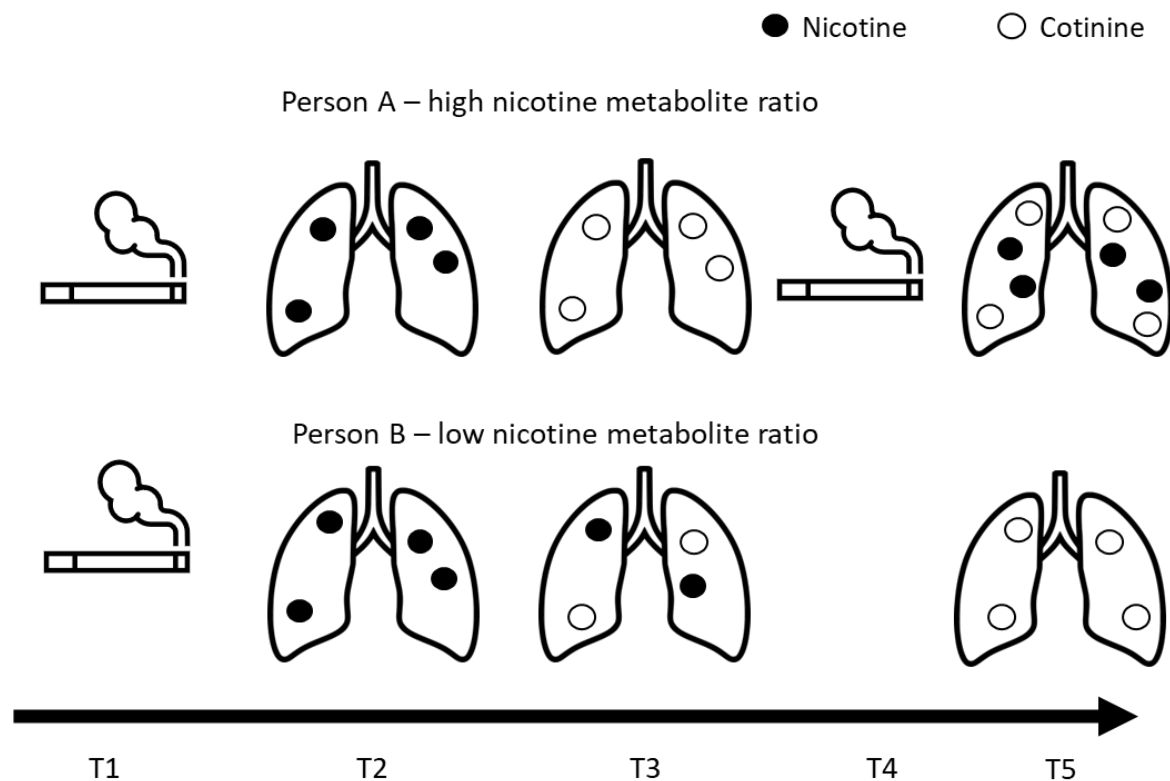

101

102 Note: This illustration shows the differences in nicotine exposure between two people who  
103 smoke: Person A who has a high nicotine metabolite ratio, and Person B who has a low  
104 nicotine metabolite ratio. At timepoint 1 (T1) both Person A and B smoke one cigarette and  
105 inhale the same amount of nicotine which can be seen circulating in their body at timepoint  
106 2 (T2). Later, at timepoint 3 (T3), Person A will have less circulating nicotine in their body  
107 than Person B (despite having inhaled the same level of nicotine) as more of the nicotine  
108 has been metabolised into cotinine. However, because smokers with higher nicotine  
109 metabolite ratios clear nicotine more quickly from their system, this often results in them  
110 smoking more cigarettes per day. So, at timepoint 4 (T4), Person A smokes another cigarette  
111 whereas Person B does not. This results in Person A having more circulating nicotine than  
112 Person B over the same time period [14].

113 Figure 2. Schematic of the study model

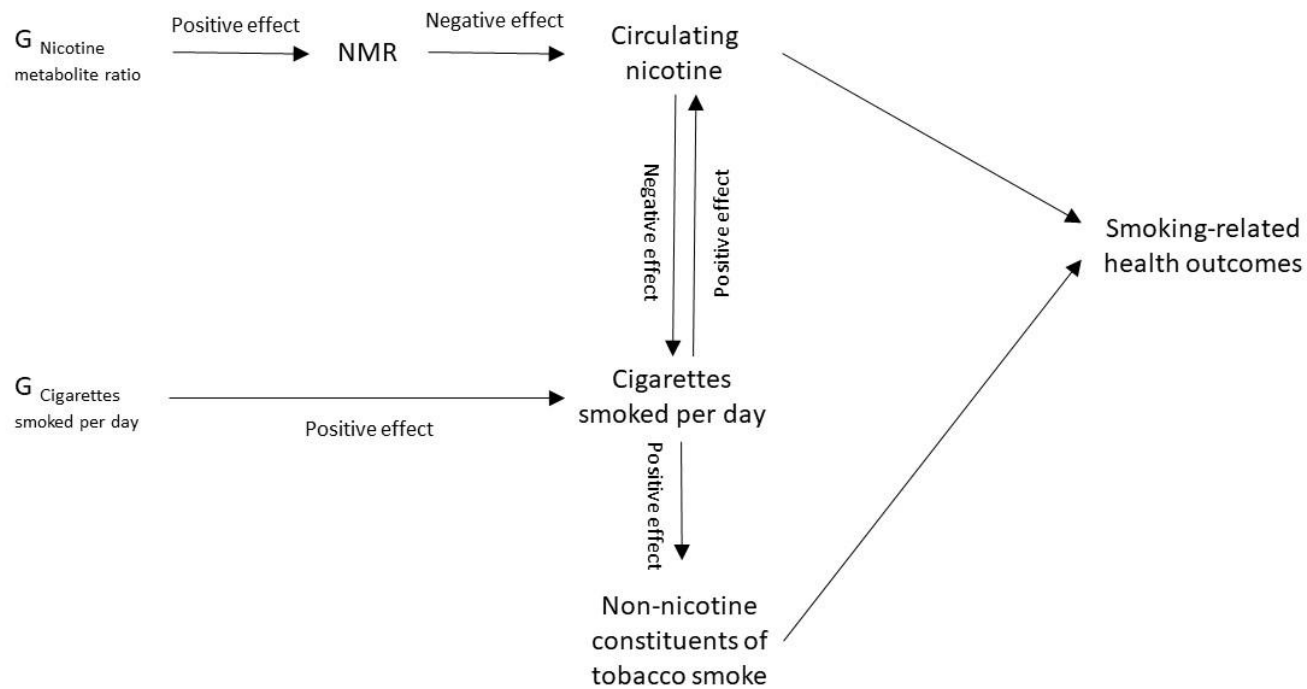

114

115 Note: This schematic shows the proposed causal pathways of the study model. Where the causal directions between variables are known

116 (i.e., evidenced in previous research), the direction of the effect is indicated as 'positive' or 'negative'. NMR = Nicotine Metabolite Ratio. G =

117 genetic variants associated with the named exposure.

118 Using this framework, it is possible to explore the effects of nicotine and the effects of the  
119 remaining constituents of tobacco smoke on health outcomes known to be impacted by  
120 smoking, and which therefore may be impacted by long-term nicotine use, such as cancer  
121 and heart and lung function [15-17]. We employed a two-sample MVMR framework to  
122 explore the direct effects of nicotine compared with the non-nicotine constituents of  
123 tobacco smoke on health outcomes (lung cancer, chronic obstructive pulmonary disease  
124 [COPD], forced expiratory volume in one second [FEV-1], forced vital capacity [FVC],  
125 coronary heart disease [CHD] and heart rate [HR]). These outcomes include positive and  
126 negative control outcomes to aid causal inference; nicotine use is known to increase heart  
127 rate, but is not thought to be carcinogenic, so if the results do not provide evidence of an  
128 effect of nicotine on heart rate, and / or if they suggest an effect of nicotine on lung cancer,  
129 the results may indicate bias from a violation of the assumptions of MR [18-20]. In  
130 supplemental analyses, our secondary aim is to compare the results with analyses using  
131 alternative proxies for nicotine exposure (i.e., cotinine and cotinine plus 3HC).

132

## 133 **Methods**

### 134 **Data Sources**

135 To identify relevant instrumental variables to include in the model, we sourced summary-  
136 level genetic data from well-powered, published GWAS. We identified SNPs associated with  
137 NMR, cotinine, cotinine plus 3HC and smoking heaviness (measured by CPD) [10, 11, 21].  
138 For the outcomes, we required data to be stratified by smoking status in order to be  
139 comparable with the population of the exposure GWAS data. An appropriately stratified  
140 GWAS (stratified by smoking status: ever versus never [22]) was only available for one of the  
141 outcomes, lung cancer. For the six remaining outcomes, we were not aware of any existing



142 available GWAS summary-level data that appropriately stratified by smoking status. We  
143 therefore used UK Biobank data to conduct GWAS of CHD, COPD, FEV, FVC and HR, stratified  
144 by smoking status and restricted to individuals of European ancestry. These analyses were:  
145 1) stratified by whether participants had ever smoked, and further stratified into 2) current  
146 smoker, or 3) former smoker, with 4) never smoker as the comparator, and were conducted  
147 using the MRC Integrative Epidemiology Unit UK Biobank GWAS pipeline (version 2) [23, 24].  
148 We also conducted stratified GWAS of body mass index (BMI) using UK Biobank data with  
149 the intention of including BMI as an outcome. However, these methods and results are not  
150 presented here as we identified a potential interpretation issue: the NMR GWAS was  
151 adjusted for BMI, meaning these results would likely be biased [25].

152

### 153 *Smoking heaviness*

154 Liu and colleagues [10] report summary-level statistics from a GWAS meta-analysis of  
155 smoking heaviness (measured by standard deviation change in CPD categories, equivalent to  
156 2-3 additional cigarettes per day) among 337,334 smokers of European ancestry in the  
157 GWAS and Sequencing Consortium of Alcohol and Nicotine (GSCAN). Smokers were defined  
158 as having ever or currently smoked and smoking heaviness (at the time of smoking) was  
159 binned into five categories or included as pre-defined bins from the original study (see  
160 supplementary material in Liu and colleagues, [10]). Analyses were adjusted for age, age-  
161 squared, sex, genetic principal components, and smoking status (current versus former).  
162 SNPs associated with CPD explained 4% of variance in CPD. SNPs were reported as  
163 independent if they explain additional variance in conditional analyses using a partial  
164 correlation-based score statistic [26]. The reported data are available  
165 at: <https://doi.org/10.13020/3b1n-ff32>.

166

167 *Nicotine*

168 Buchwald and colleagues [11] report summary-level statistics from a GWAS meta-analysis of  
169 the standard deviation change in NMR among 5,185 current smokers of European descent  
170 with cotinine levels  $\geq 10$  ng/ml (indicating recent smoking). NMR is a ratio of  
171 3-hydroxycotinine/cotinine which indicates how quickly a person metabolises and clears  
172 nicotine. Analyses were adjusted for population substructure, age, sex, BMI, alcohol use,  
173 and birth year. The SNPs associated with NMR explained  $\sim 38\%$  of the variance in NMR. SNPs  
174 were reported as independent if they explained additional variance in a step-wise  
175 conditional regression using genome-wide complex trait analysis [27]. The reported data are  
176 available on request from the authors. Information relating to the nicotine measures used in  
177 the supplemental analysis (using cotinine and cotinine plus 3HC data as a proxy for nicotine  
178 exposure) can be found in the Supplementary Material (Supplemental Note S1).

179

180 *Lung Cancer*

181 McKay and colleagues [22] report summary-level statistics from a case-control GWAS meta-  
182 analysis of overall lung cancer risk (including adenocarcinoma, squamous cell carcinoma,  
183 and small cell carcinoma) among 50,046 individuals of European descent using the  
184 International Lung Cancer Consortium (ILCCO). Analyses were adjusted for age, gender,  
185 country (if applicable) and significant principal components. We received the data via  
186 request to the authors and we additionally received the data stratified by smoking status  
187 (ever versus never smoking). Definitions of ever and never smoking differed by cohort  
188 included in the meta-GWAS. Details of the definitions can be found in McKay and  
189 colleagues' [22] supplementary note.

190

191 *Non-Cancer Smoking-Related Health Outcomes*

192 We conducted GWAS of non-cancer health outcomes using data from UK Biobank, a  
193 population-based health research resource consisting of approximately 500,000 people,  
194 aged between 38 years and 73 years, who were recruited between the years 2006 and 2010  
195 from across the UK [28]. UK Biobank has a particular focus on identifying determinants of  
196 human diseases in middle-aged and older individuals who provided a wide range of health  
197 information (data available at [www.ukbiobank.ac.uk](http://www.ukbiobank.ac.uk)). A full description of the study design,  
198 participants, and quality control (QC) methods have been described previously [28, 29]. UK  
199 Biobank received ethics approval from the Research Ethics Committee (REC reference for UK  
200 Biobank is 11/NW/0382). Written informed consent was obtained from participants prior to  
201 their participation in UK Biobank. Approval to use these data was sought from and  
202 approved by UK Biobank (project 9142). All studies approved by UK Biobank do not require  
203 individual ethical clearance as UK Biobank has approval from the North West Multi-centre  
204 Research Ethics Committee as a Research Tissue Bank under which each approved study  
205 operates.

206

207 The full data release contains the cohort of successfully genotyped samples (n=488,377).  
208 Further information about genotyping and imputation can be found in the Supplementary  
209 Material (Supplemental Note S2). Individuals with mismatched sex were excluded and the  
210 analyses were restricted to those of 'European' ancestry using an in-house k-cluster means  
211 method. The GWAS were conducted using the linear mixed model (LMM) association  
212 method as implemented in BOLT-LMM (v2.3) [30], adjusting for genotype array, age and sex  
213 [23]. BOLT-LMM association statistics are on the linear scale, so test statistics (betas and

214 their corresponding standard errors) relating to binary phenotypes were transformed to log  
215 odds ratios and their corresponding 95% confidence intervals (95% CI) on the liability scale  
216 using a Taylor transformation expansion series [31]. Each outcome was stratified by self-  
217 reported participant smoking status (ever [further stratified by current or former] and  
218 never), resulting in four GWAS per outcome. Smoking status was categorised as never,  
219 previous, and current smoking in UK Biobank (field ID 20116). From this variable, we derived  
220 an ‘ever smokers’ category which was defined as currently or having previously smoked  
221 occasionally, most days or daily (i.e., having smoked more than just once or twice). Current  
222 smoking was defined as currently smoking occasionally, most days or daily. Former smoking  
223 was defined as not currently smoking but having previously smoked occasionally, most days  
224 or daily (i.e., more than just once or twice). Those who had tried smoking once or twice or  
225 who had never smoked were categorised as never smokers.

226

227 We identified COPD cases as participants who self-reported a doctor’s diagnosis of COPD.  
228 Lung function (FEV-1 and FVC, in litres) was measured using a Vitalograph spirometer. CHD  
229 diagnosis was determined using linked hospital admission data (ICD codes relating to  
230 Ischemic Heart Disease). Further information regarding each health outcome (including UK  
231 Biobank field IDs) can be found in the Supplementary Material (Supplemental Note S3).

232

### 233 **Statistical Analysis**

234 All analyses were conducted using R version 1.4.1.

235

236 *Selection of genetic variants*

237 We selected conditionally independent (at the genome-wide significant level,  $p < 5 \times 10^{-8}$ )  
238 genetic variants identified in the GWAS of NMR and CPD for inclusion in the analysis [10,  
239 11]; 55 SNPs associated with smoking heaviness were identified as conditionally  
240 independent [10]; 7 SNPs associated with the NMR were identified as conditionally  
241 independent.

242  
243 After removing SNPs which were not available in the outcome GWAS (where no available  
244 proxy could be identified), harmonising, and clumping the combined exposure datasets with  
245 the outcome dataset, the number of SNPs in each analysis varied. Supplementary Tables S1-  
246 S6 detail which SNPs were included and excluded (with reasons) in each analysis, and  
247 Supplemental Note S4 gives further details of the proxy search and clumping methods.

248  
249 We tested instrument strength and validity using the two-sample conditional F-statistic for  
250 MVMR and Cochran Q statistic [9, 32]. The conditional F-statistic for MVMR indicates  
251 instrument strength of each exposure when accounting for the prediction of other  
252 exposures in the model (i.e., whether the SNPs jointly predict smoking heaviness after  
253 predicting the NMR, and vice versa) [33]. The standard critical values for the F-statistic and  
254 Q-statistic can be approximated so F-statistic should be greater than 10 to indicate sufficient  
255 instrument strength and Q estimates should be less than the number of SNPs included in  
256 the model to indicate no excessive heterogeneity [34, 35].

257  
258 *Univariable Mendelian randomisation*

259 For comparison with the MVMR analysis, we considered the total effect of both the NMR  
260 and smoking heaviness on each health outcome using MR. We used four complementary

261 MR methods (inverse variance weighted [MR-IVW], MR-Egger, weighted median, weighted  
262 mode). Details of the univariable MR analysis methods can be found in Supplemental Note  
263 S5.

264

#### 265 *Multivariable Mendelian randomisation*

266 We explored the direct effects of both the NMR and smoking heaviness on health outcomes  
267 using MVMR. We used summary data from Buchwald and colleagues' [11], GSCAN [10] and  
268 ILCCO [22], and UK Biobank GWAS pipeline results. We repeated these analyses using two  
269 complementary methods – MVMR-IVW and MVMR-Egger [9, 36].

270

271 Given that the GWAS of smoking heaviness was restricted to ever smokers and the GWAS of  
272 the NMR was restricted to current smokers, the analyses were restricted to ever and  
273 current smokers as the summary statistics are not applicable to never smokers. However,  
274 the ILCCO lung cancer data have only been stratified by ever and never smoking status;  
275 therefore, analyses restricted to current smokers were not possible when exploring lung  
276 cancer incidence. In supplementary analyses, we additionally stratified the analysis by never  
277 smokers to explore potential horizontal pleiotropy – effects observed among never smokers  
278 could indicate horizontally pleiotropic effects (i.e., the included SNPs influencing the  
279 outcome directly, or via another phenotype, but not through the measured exposure),  
280 misreporting of smoking status, or residual population stratification. Horizontally pleiotropic  
281 genetic variants are not valid instruments in MR analyses and their inclusion would result in  
282 a violation of the exclusion restriction assumption (further details on the assumptions of MR  
283 can be found in Supplemental Note S6). Pleiotropy robust methods (e.g., MR-Egger) are  
284 robust to horizontal pleiotropy under assumptions of the form that pleiotropy takes. For all

285 outcomes except lung cancer (where data are unavailable), we also included supplementary  
 286 results restricted to former smokers to explore whether any health effects found among  
 287 current smokers may be recoverable (i.e., not present among former smokers who have  
 288 recovered following smoking cessation).

289

290

## Results

291

### Descriptive Statistics

292

Smoking heaviness data were collected from 337,334 current and former smokers who

293

reported their current or past smoking behaviour respectively (analyses corrected for

294

current versus former status, average bin 3 [SD = 1] equating to 16-25 cigarettes per day)

295

[10]. NMR data were collected from 5,185 current smokers [11]. Case rates and means (with

296

standard deviations) for the outcomes in each of the samples included in the analyses are

297

shown in Table 1.

298

299

Table 1. Descriptive statistics for participants included in the genome-wide association

300

studies of lung cancer, coronary heart disease, chronic obstructive pulmonary disease, lung

301

function and heart rate.

|                                                   | Ever smokers                                | Current Smokers | Former Smokers | Never Smokers |
|---------------------------------------------------|---------------------------------------------|-----------------|----------------|---------------|
|                                                   | <b>International Lung Cancer Consortium</b> |                 |                |               |
| N                                                 | 40,187                                      | N/A             | N/A            | 9,859         |
| Lung Cancer (case rate)                           | 57%                                         | N/A             | N/A            | 24%           |
|                                                   | <b>UK Biobank</b>                           |                 |                |               |
| N                                                 | 213,341                                     | 49,721          | 163,620        | 258,056       |
| Coronary Heart Disease (case rate)                | 11%                                         | 11%             | 11%            | 6%            |
| Chronic Obstructive Pulmonary Disease (case rate) | 3%                                          | 6%              | 2%             | <1%           |

|                                                |               |               |               |               |
|------------------------------------------------|---------------|---------------|---------------|---------------|
| Forced Expiratory Volume<br>(mean litres [SD]) | 2.82 (0.78)   | 2.78 (0.83)   | 2.83 (0.76)   | 2.88 (0.78)   |
| Forced Vital Capacity<br>(mean litres [SD])    | 3.78 (0.97)   | 3.81 (1.02)   | 3.78 (0.96)   | 3.78 (0.99)   |
| Heart Rate<br>(mean beats per minute [SD])     | 69.05 (11.38) | 71.27 (11.58) | 68.40 (11.23) | 68.93 (11.10) |

302

303 Note: SD = standard deviation

304

### 305 **Instrument strength and heterogeneity**

306 Where the Cochran's Q statistic was greater than the number of SNPs included in the

307 model, it is advised to focus on pleiotropy robust methods as this indicates heterogeneity

308 and potential pleiotropy. MR-Egger and MVMR-Egger give estimates that are robust to

309 directional horizontal pleiotropy under the assumption that this pleiotropy is uncorrelated

310 with the strength of association between the SNP and the exposure [36]. However, using

311 the MR-Egger and MVMR-Egger methods limits the statistical power of the analysis

312 compared to MVMR-IVW. Therefore, although we present the IVW results in the text, we

313 have explicitly stated where the sensitivity analyses differ substantially (i.e., where the

314 results could lead to different conclusions) and in these cases, additionally compare the

315 Egger results (and weighted mode and weighted median results) in the MR analyses.

316

317 The F-statistics indicate that the SNPs included in these analyses are strong instruments for

318 assessing the direct effects of smoking heaviness while accounting for the effect of the NMR

319 ( $F_s = 33.96$  and  $34.17$ ) and for assessing the direct effects of the NMR while accounting for

320 smoking heaviness ( $F_s = 30.17$  and  $49.08$ ).

321



322 **Binary outcomes**

323 The total and direct effects of the NMR and smoking heaviness on lung cancer, CHD, COPD,  
324 and are shown in Figure 3 (ever smokers). These results are also included in Supplementary  
325 Tables S7 (lung cancer), S8 (CHD), and S9 (COPD) along with the F-statistics, Q-statistics and  
326 Egger intercept and the results among current, never and formers smokers. We have  
327 focussed on the results among ever smokers rather than current smokers here as receiving  
328 a diagnosis of lung cancer, CHD or COPD may increase the likelihood of someone quitting  
329 smoking, so the results are more relevant and interpretable among ever smokers. The  
330 results among current smokers can be found in Supplemental Note S7 and Supplementary  
331 Figure S2. Additionally, we have included the median and mode weighted MR sensitivity  
332 analyses in Supplementary Table S10. Results are presented as odds ratios per standard  
333 deviation (SD) increase in the exposure phenotype (i.e., per SD increase in the NMR or  
334 cigarettes per day).

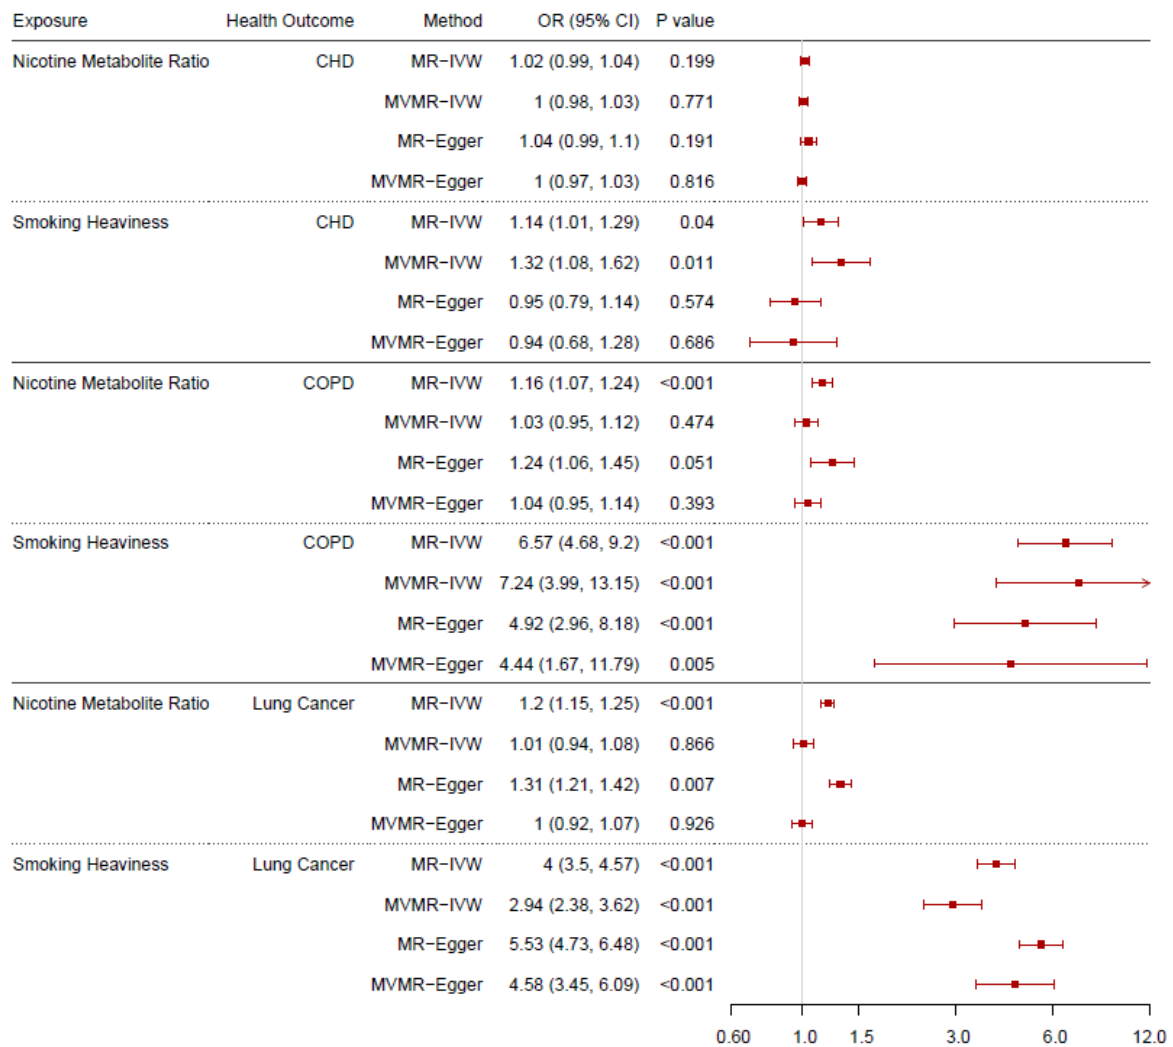

335

336 Figure 3. Forest plot displaying the effect of nicotine metabolite ratio and smoking heaviness on  
 337 coronary heart disease (CHD), chronic obstructive pulmonary disease (COPD) and lung cancer  
 338 incidence: univariable Mendelian randomisation (MR) and multivariable Mendelian randomisation  
 339 (MVMR) results among ever smokers.

340

341

### 342 *Lung Cancer*

343 The MR-IVW results indicate strong evidence to suggest that increased NMR and increased  
 344 smoking heaviness both increase the risk of developing lung cancer among ever smokers  
 345 (odds ratio [OR] = 1.20, 95% confidence interval [CI] 1.15 to 1.25; OR = 4.00, 95% CI 3.50 to  
 346 4.57 respectively). However, the MVMR-IVW results do not provide clear evidence to  
 347 suggest an effect of NMR on lung cancer risk (OR = 1.01, 95% CI 0.94 to 1.08), and indicate

348 that only increased smoking heaviness increased lung cancer risk (OR = 2.94, 95% CI 2.38 to  
349 3.62). Although there is considerable evidence of heterogeneity and potential pleiotropy in  
350 the smoking heaviness analyses among ever smokers, these results are supported by the  
351 MR-Egger results. Furthermore, there is no clear evidence of pleiotropy or bias due to  
352 population stratification indicated by the results among never smokers.

353

### 354 *Coronary Heart Disease*

355 The MR-IVW results provide no clear evidence that NMR affects CHD risk (OR = 1.02, 95% CI  
356 0.99 to 1.04). This is supported by the MR-Egger results, but the weighted median and  
357 weighted mode results suggested there may be a weak effect (OR = 1.03, 95% CI 1.01 to  
358 1.05, OR = 1.03, 95% CI 1.01 to 1.05 respectively). The results provide some evidence that  
359 increased smoking heaviness increases CHD risk (OR = 1.14, 95% CI 1.01 to 1.29) among ever  
360 smokers. The weighted median and weighted mode results support this finding (OR = 1.14,  
361 95% CI 1.02 to 1.29, OR = 1.14, 95% CI 1.02 to 1.27 respectively); however, the MR-Egger  
362 analysis does not support this (OR = 0.95, 95% CI 0.79 to 1.14), and there is some evidence  
363 of heterogeneity indicated by the Q-statistics and the Egger intercept indicated weak  
364 directional pleiotropy which is supported by evidence of a protective effect among never  
365 smokers. The MVMR-IVW results provide no clear evidence of an effect of NMR on CHD risk  
366 (OR = 1.00, 95% CI 0.98 to 1.03) but some evidence that increased smoking heaviness  
367 increases CHD risk (OR = 1.32, 95% CI 1.08 to 1.62). As with the univariable results, the  
368 MVMR-Egger analyses do not support this (OR = 0.94, 95% CI 0.68 to 1.28) and there was  
369 evidence of heterogeneity and potential directional pleiotropy and some evidence of  
370 horizontal pleiotropy or bias due to population stratification in the analysis among never  
371 smokers.

372

373 *Chronic Obstructive Pulmonary Disease*

374 The MR-IVW results indicate that increased NMR and smoking heaviness increase the risk of  
375 developing COPD among ever smokers (OR = 1.16, 95% CI 1.07 to 1.24, OR = 6.57, 95% CI  
376 4.68 to 9.20 respectively). However, the MVMR-IVW results indicate no clear effect of NMR  
377 on COPD risk (OR = 1.03, 95% CI 0.95 to 1.12) but suggest that increased smoking heaviness  
378 increases COPD risk among ever smokers (OR = 7.24, 95% CI 3.99 to 13.15). These results  
379 are supported by the MR sensitivity analyses and MVMR-Egger results and there is no clear  
380 evidence of heterogeneity or directional pleiotropy or horizontal pleiotropy or bias due to  
381 population stratification among never smokers (where precise null effects were observed).

382

383 **Continuous outcomes**

384 The total and direct effects of the NMR and smoking heaviness on lung function (FEV-1 and  
385 FVC) and heart rate are shown in Figures 4 (ever smokers) and 5 (current smokers). These  
386 results are also displayed in Supplementary Tables S11 (FEV-1), S12 (FVC), and S13 (heart  
387 rate) along with the F-statistics, Q-statistics and Egger intercept and the results among ever,  
388 current, never and formers smokers. Additionally, we have included the median and mode  
389 weighted MR sensitivity analyses in Supplementary Table 10. Results are presented as betas  
390 per standard deviation (SD) increase in the exposure phenotype (i.e., per SD increase in the  
391 NMR or cigarettes per day). As per MR-STROBE guidelines [37], we have reported the results  
392 in text on an interpretable scale (i.e., difference in outcome in relevant units e.g., mL).  
393 However, to aid comparability across outcomes, we present the results per standard  
394 deviation change in the forest plots.

395

396

397

398

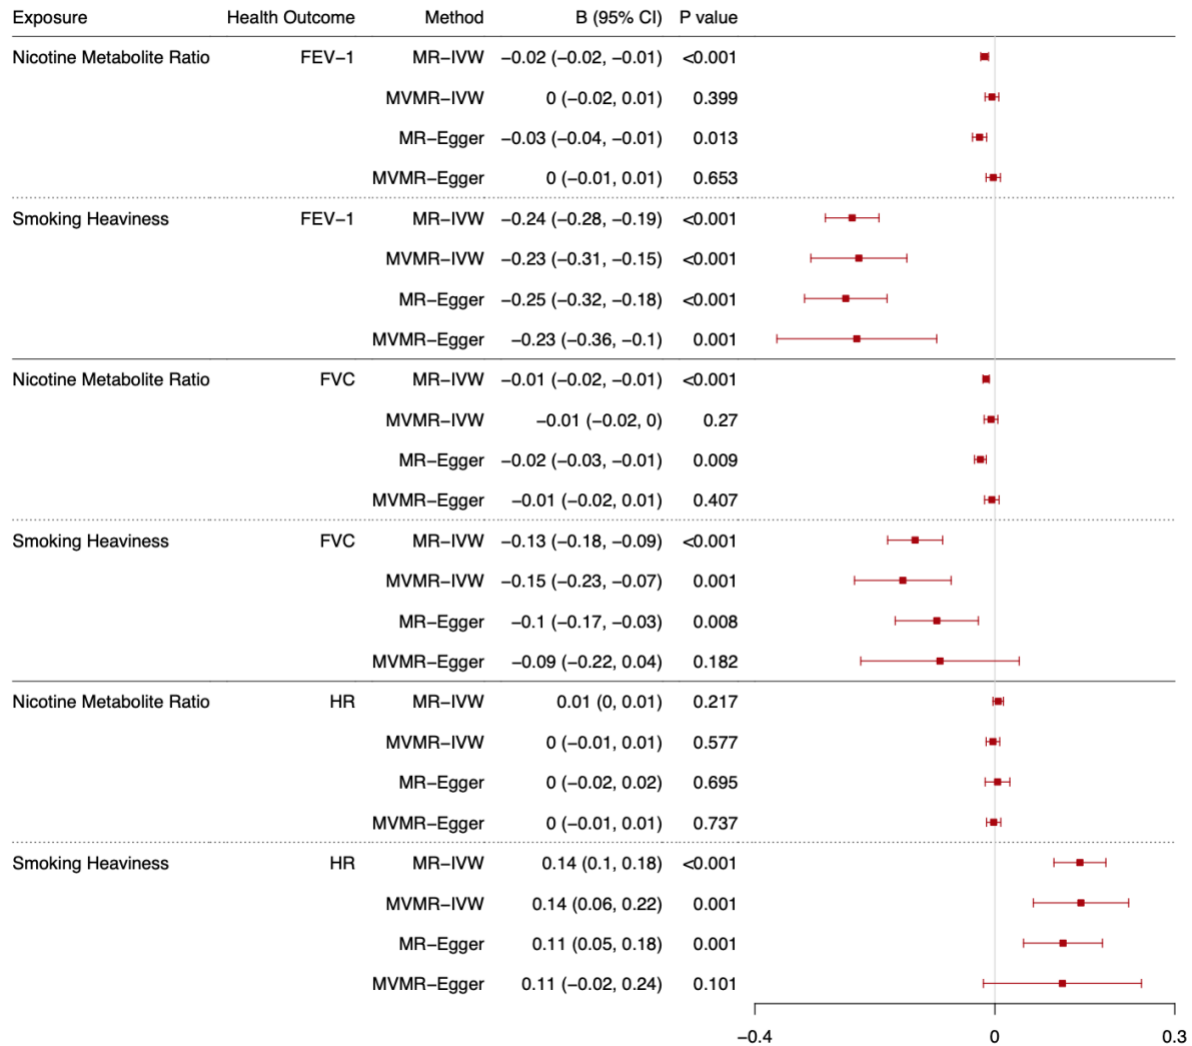

399

400 Figure 4. Forest plot displaying the effect of nicotine metabolite ratio and smoking

401 heaviness on standard deviations of lung function (FEV-1 and FVC), and heart rate (HR):

402 univariable Mendelian randomisation (MR) and multivariable Mendelian randomisation

403 (MVMR) results among ever smokers.

404

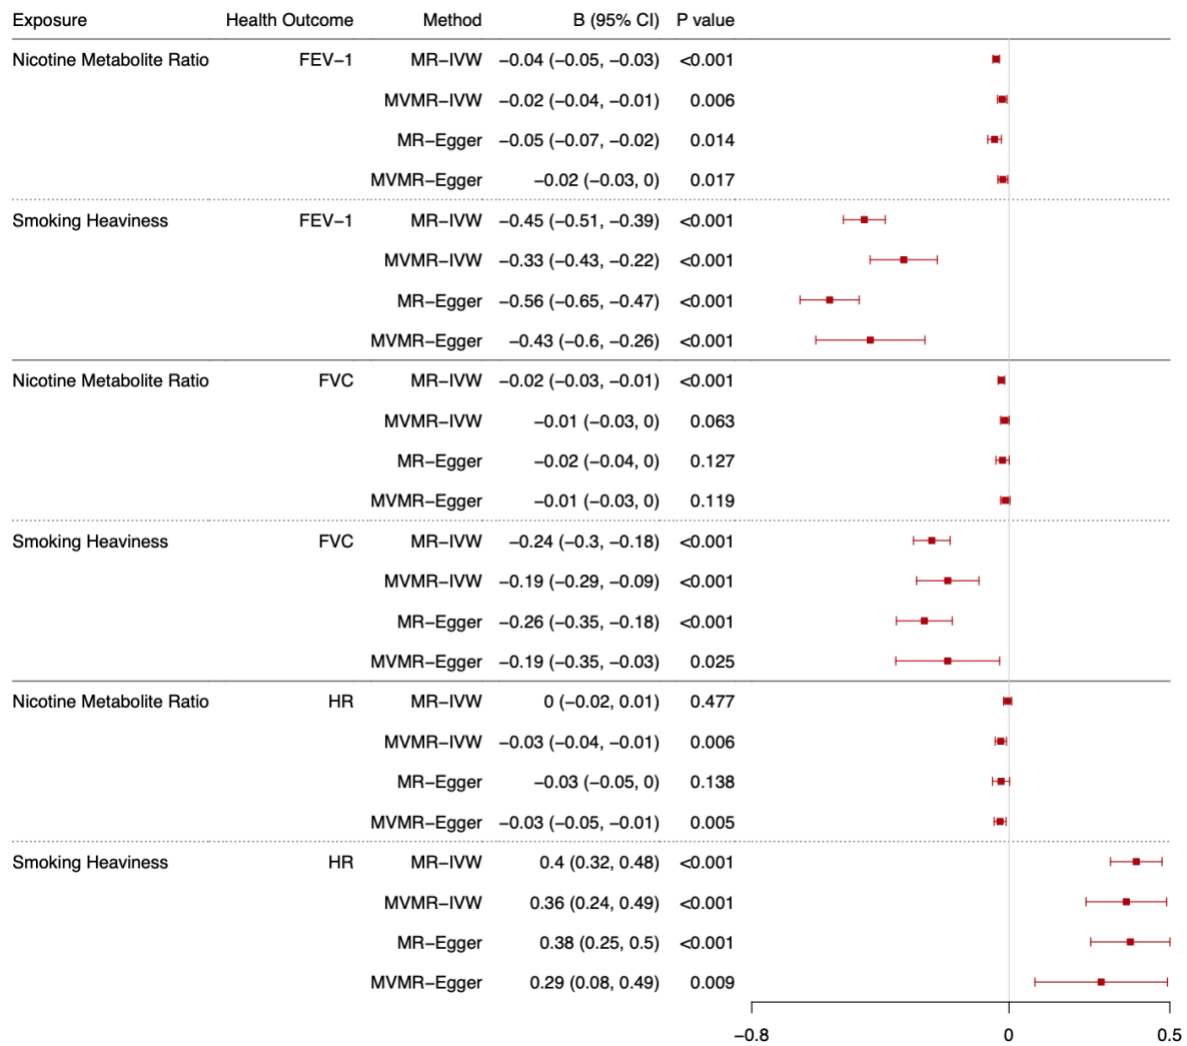

405

406 Figure 5. Forest plot displaying the effect of nicotine metabolite ratio and smoking  
 407 heaviness on standard deviations of lung function (FEV-1 and FVC), and heart rate (HR):  
 408 univariable Mendelian randomisation (MR) and multivariable Mendelian randomisation  
 409 (MVMR) results among current smokers.

410

411 *Forced Expiratory Volume in 1 Second*

412 The results relating to FEV-1 are presented in the text as changes in millilitres (mL) of  
 413 expiration per standard deviation increase in the exposure. The MR-IVW results indicate  
 414 that increased NMR and smoking heaviness both decrease FEV-1 among ever smokers  
 415 (Figure 4,  $b = -13.35$ , 95% CI -18.38 to -8.33,  $b = -185.49$ , 95% CI -220.39 to -150.60  
 416 respectively). However, there is no clear evidence of an effect of NMR on FEV-1 in the

417 MVMR-IVW analysis ( $b = 3.82$ , 95% CI -12.63 to 4.98), whereas there is evidence to suggest  
418 increased smoking heaviness decreased FEV-1 among ever smokers ( $b = -176.78$ , 95% CI -  
419 239.15 to -114.41). These results are supported by the MR sensitivity analyses and MVMR-  
420 Egger results and there is no evidence of directional pleiotropy in the analyses, but there is  
421 evidence of heterogeneity in all analyses except for the NMR MR analyses. However, there  
422 is evidence of horizontal pleiotropy or bias due to population stratification in the NMR MR  
423 analyses among never smokers.

424

425 Among current smokers (Figure 5), the MR-IVW results indicate that increased NMR and  
426 smoking heaviness decreased FEV-1 ( $b = -33.33$ , 95% CI -41.76 to -24.90,  $b = -374.28$ , 95% CI  
427 -428.21 to -320.35 respectively). However, the MVMR-IVW results indicate a protective  
428 effect of nicotine exposure (i.e., lower nicotine exposure, due to higher NMR, lowers lung  
429 function) when smoking heaviness is accounted for among current smokers (NMR  $b = -$   
430 17.77, 95% CI -29.92 to -5.62). The MVMR-IVW analyses support the MR-IVW results for  
431 smoking heaviness ( $b = -272.36$ , 95% CI -359.31 to -185.42). These results are supported by  
432 the MR sensitivity analyses and MVMR-Egger analyses. There is some evidence of  
433 heterogeneity in all analyses except the NMR MR analyses, directional pleiotropy in the MR  
434 analysis of smoking heaviness, and horizontal pleiotropy or bias due to population  
435 stratification in the NMR MR analyses among never smokers.

436

#### 437 *Forced Vital Capacity*

438 The results relating to FVC are presented in the text as changes in mL of capacity per  
439 standard deviation increase in the exposure. The MR-IVW results indicate that increased  
440 NMR and smoking heaviness decreased FVC among ever smokers (Figure 4,  $b = -14.34$ , 95%

441 CI -19.42 to -9.26,  $b = -129.63$ , 95% CI -174.27 to -85.00 respectively). However, there is no  
442 clear evidence of an effect of NMR on FVC in the MVMR-IVW analysis ( $b = -6.32$ , 95% CI -  
443 17.41 to 4.77), whereas there is evidence to suggest increased smoking heaviness decreased  
444 FVC among ever smokers, after accounting for NMR ( $b = -149.55$ , 95% CI -228.07 to -71.03).  
445 These results are supported by the MR sensitivity analyses and MVMR-Egger results,  
446 although there is less clear evidence of an effect in the MVMR-Egger results for smoking  
447 heaviness than in the MR-Egger results. There is some evidence of heterogeneity in all  
448 analyses except the NMR MR analyses, but no clear evidence of directional pleiotropy.  
449 There is weak evidence to suggest potential horizontal pleiotropy / bias due to population  
450 stratification in the NMR MR analyses and the smoking heaviness MR-IVW analysis among  
451 never smokers.

452

453 Among current smokers (Figure 5), the MR-IVW results suggest that increased NMR and  
454 smoking heaviness decreased FVC ( $b = -24.50$ , 95% CI -34.61 to -14.39,  $b = -246.13$ , 95% CI -  
455 304.36 to -187.89 respectively). MVMR-IVW results support the evidence for an effect of  
456 smoking cessation on FVC but indicate weak evidence of a protective effect of nicotine  
457 exposure when smoking heaviness is accounted for (NMR  $b = -13.50$ , 95% CI -27.39 to 0.39).  
458 The MR median and mode weighted analyses support these findings, and the MR-Egger and  
459 MVMR-Egger results are in the same direction but provide weaker support for the NMR  
460 results. There is evidence in the MVMR-IVW analysis to suggest that increased smoking  
461 heaviness decreases FVC ( $b = -195.31$ , 95% CI -294.72 to -95.90), which is supported by the  
462 MVMR-Egger results. There is some evidence of heterogeneity in all analyses except the  
463 NMR MR analyses, but no clear evidence of directional pleiotropy. There is weak evidence



464 to suggest potential horizontal pleiotropy or bias due to population stratification in the NMR  
465 MR analyses and the smoking heaviness MR-IVW analysis among never smokers.

466

#### 467 *Heart Rate*

468 The results relating to heart rate are presented in the text as changes in beats per minute  
469 per standard deviation increase in the exposure. Among ever smokers (Figure 4), the MR-  
470 IVW results suggest that increased NMR does not affect heart rate ( $b = 0.06$ , 95% CI -0.04 to  
471 0.16), but increased smoking heaviness does increase heart rate ( $b = 1.61$ , 95% CI 1.12 to  
472 2.10). The MVMR-IVW results support the results for both NMR and smoking heaviness ( $b =$   
473  $-0.04$ , 95% CI -0.16 to 0.09,  $b = 1.63$ , 95% CI 0.73 to 2.54 respectively). The MR sensitivity  
474 analyses and MVMR-Egger results also support these findings. There is some evidence of  
475 heterogeneity in all analyses, but no clear evidence of directional pleiotropy. There is weak  
476 evidence to suggest potential horizontal pleiotropy or bias due to population stratification in  
477 the MR-IVW NMR, MR-IVW and MR-Egger smoking heaviness analyses among never  
478 smokers.

479

480 Among current smokers (Figure 5), the MR-IVW results indicate no clear effect of NMR on  
481 heart rate ( $b = -0.05$ , 95% CI -0.20 to 0.09) but indicate that increased smoking heaviness  
482 increases heart rate ( $b = 4.58$ , 95% CI 3.65 to 5.51). However, the MVMR-IVW results  
483 suggest that decreased NMR when accounting for smoking heaviness (i.e., increased  
484 nicotine exposure per cigarette) increases heart rate among current smokers ( $b = -0.30$ , 95%  
485 CI -0.50 to -0.10) and increased smoking heaviness accounting for nicotine exposure  
486 increases heart rate ( $b = 4.22$ , 95% CI 2.77 to 5.68). The MR sensitivity and MVMR-Egger  
487 results support the MR-IVW and MVMR-IVW findings. There is some evidence of

488 heterogeneity in all analyses except the MR NMR analyses, but no clear evidence of  
489 directional pleiotropy. There is weak evidence to suggest potential horizontal pleiotropy /  
490 bias due to population stratification in the MR-IVW NMR, MR-IVW and MR-Egger smoking  
491 heaviness analyses among never smokers.

492

### 493 **Interpreting the NMR MVMR results**

494 In the MVMR results above, we interpret an increase in the direct effect of NMR as a  
495 reduction in nicotine exposure per cigarette smoked. Supplementary Table S14 illustrates  
496 how the estimated direct effects of NMR found can be flipped to indicate the effect of  
497 increased nicotine exposure per cigarette smoked on the outcome.

498

### 499 **Sensitivity and supplementary analysis**

500 The results of the sensitivity analyses whereby cotinine and cotinine plus 3HC were used as  
501 alternative proxies for nicotine exposure can be found in Supplementary Tables S7-S13. The  
502 results are generally in line with the main results with some exceptions. Increased cotinine  
503 and cotinine plus 3HC exposure appears to increase risk of lung cancer (to a lesser extent  
504 than non-nicotine constituents of tobacco smoke). There is also less evidence to suggest a  
505 protective effect of nicotine on COPD among current smokers in the analyses alternatively  
506 including cotinine and cotinine plus 3HC and there is less evidence of an effect on FEV-1 and  
507 heart rate among current smokers in the analyses including cotinine plus 3HC.

508

509 The results among former smokers can be found in Supplementary Tables S7-S13. The  
510 findings suggest that there are likely lasting detrimental effects of smoking, but they are  
511 unlikely to be attributable to nicotine exposure.

512

## Discussion

513 Overall, we found little evidence to suggest a major detrimental effect of nicotine exposure  
514 on health when using an MVMR model to distinguish the direct effects of nicotine from the  
515 direct effects of non-nicotine components of tobacco smoke (using NMR and CPD as  
516 proxies). Our model suggests that, among current smokers, increased nicotine exposure per  
517 cigarette smoked increases heart rate but may have protective effects on lung function and  
518 COPD. Our findings in relation to smoking heaviness were generally as expected except for  
519 CHD, for which there was limited evidence of an effect. In line with previous research [15-  
520 17], increased smoking heaviness detrimentally impacted risk of lung cancer, COPD, and  
521 CHD, as well as lung function and heart rate. As expected, and in line with evidence from a  
522 range of human and animal studies [19], our analysis suggests that exposure to nicotine  
523 without the remaining constituents of tobacco smoke increases heart rate (the positive  
524 control).

525

526 In contrast to previous evidence, in which increased smoking heaviness was found to  
527 increase risk of CHD, we found limited evidence of an effect of smoking heaviness on CHD  
528 among ever smokers. Previous MR studies have also shown minimal evidence of this effect  
529 using UK Biobank data [38], which could indicate that the outcome GWAS sample may not  
530 be representative of the general population. Indeed, UK Biobank participants are more likely  
531 to describe themselves as female, have fewer health issues, live in less socioeconomically  
532 deprived areas, and be more highly educated, than the general population and thus the  
533 results may suffer from “healthy volunteer” selection bias [39]. Given that CHD may  
534 disproportionately affect men [40] and people with generally poorer health, this may

535 explain the limited findings. Additionally, we may have had limited power to detect this  
536 effect given the range of causes of CHD and relatively few cases in UK Biobank.

537

538 Another unexpected finding was the apparent protective effects of nicotine on lung health  
539 (COPD, FEV-1 and FVC) among current smokers. However, this finding may be due to those  
540 with a lower NMR (and greater circulating nicotine per cigarette) needing to inhale less  
541 smoke and other non-nicotine constituents per cigarette. Measuring smoking heaviness by  
542 the number of cigarettes smoked per day will not completely capture the variation in  
543 smoking intensity, so there could be a small effect of intensity which is captured in the  
544 instrumental variable for NMR because increased NMR may lead to increased inhalation per  
545 cigarette. Given the magnitude of effects found for NMR are much smaller than for smoking  
546 heaviness, the residual variance in smoking intensity impacting the NMR estimates appears  
547 to be limited. Furthermore, if there is a true protective effect it may not be clinically  
548 important given the magnitude of the effects found. For example, patients only perceive  
549 differences in FEV-1 with changes of 112 mL [41] whereas the MVMR-IVW analyses  
550 indicated an increase of only 17.77 mL per SD increase in NMR.

551

552 In the supplementary analyses, we also saw apparent effects of cotinine and cotinine plus  
553 3HC on lung cancer risk in the MVMR models. Given that nicotine is not thought to be  
554 carcinogenic, these findings could indicate pleiotropic pathways are involved for these  
555 additional exposures (e.g., via metabolism). This highlights that NMR may be a more  
556 appropriate proxy for nicotine exposure in this context; NMR is a measure of nicotine  
557 metabolism, therefore by including it in an MVMR model which is robust to pleiotropy via  
558 each exposure in the model, we account for pleiotropic pathways via metabolism.

559

560 Although this is the first study to use MVMR to explore the impact of long-term nicotine  
561 inhalation in humans and it may provide an early indication of the health impact of inhaling  
562 nicotine via e-cigarettes, the study is not without limitations. In addition to potential issues  
563 with “healthy volunteer” selection bias, the study is limited by the potential presence of  
564 horizontal pleiotropy in some analyses (as indicated by effects seen in the analyses  
565 restricted to non-smokers and the Egger analyses), which violates an assumption of the  
566 method. The effect estimates among never smokers cannot be meaningfully interpreted as  
567 we know that never smokers (or at least those who accurately self-report never smoking) do  
568 not smoke any cigarettes per day despite being predisposed to heavier smoking, but  
569 evidence of an effect in never smokers (along with a high Cochran’s Q statistic) is indicative  
570 of horizontal pleiotropy. Despite this, no effects were observed in the relationship between  
571 NMR and the health outcomes in the MVMR analyses restricted to never smokers.  
572 Additionally, while the MR-Egger test of directional pleiotropy indicated directional  
573 pleiotropic effects in the relationship between smoking heaviness and health outcomes,  
574 there was no clear evidence of directional horizontal pleiotropic effects in the relationship  
575 between NMR and health outcomes among ever and current smokers. Therefore, these  
576 sensitivity analyses suggest our interpretation of the direct effects of nicotine on the  
577 selected health outcomes should not be impacted by directional horizontal pleiotropy or  
578 population stratification.

579

580 Further limitations of the study relate to the adjustment and inclusion criteria of the GWAS  
581 used for analysis. The first issue pertains to differences between the exposure GWAS  
582 inclusion criteria: the GWAS of NMR was restricted to current smokers whereas the GWAS

583 of smoking heaviness was restricted to ever regular smokers. However, smoking heaviness  
584 was assessed as current or past smoking heaviness (i.e., the measure is representative of  
585 the behaviour of current smokers despite being a retrospective measure, therefore we are  
586 assuming that the two populations are similar). If this assumption is incorrect, we may have  
587 introduced bias into our findings. Second, in contrast to the GWAS of smoking behaviour  
588 and the health outcomes, the NMR GWAS was adjusted for BMI. Adjusting for BMI in one  
589 exposure variable meant that we could not clearly assess the effect of nicotine on BMI,  
590 however it also may impact our interpretation of results where the outcomes are associated  
591 with BMI (i.e., where BMI is a plausible co-variate of the exposure and outcome  
592 phenotypes) [25]. As lung and heart health could be impacted by BMI [42, 43], some of the  
593 effect sizes observed may be biased towards the null. Although there are approaches  
594 available to correct for this bias [44], it is not feasible to implement this correction with the  
595 limited number of SNPs included in this analysis. Therefore, we must interpret these  
596 findings with caution. Third, we did not use data from an updated CPD GWAS with a larger  
597 sample size and more diverse sample that was released in 2022 [45] after analysis was  
598 complete for this study. The study team agreed that it would be detrimental to use the new  
599 data release restricted to European ancestry. The number of SNPs found to be associated  
600 with smoking heaviness was three times greater in the 2022 data release compared to the  
601 2019 data release, which would cause a problematic imbalance/mismatch between the  
602 number of SNPs used to instrument smoking heaviness versus NMR, and potentially lead to  
603 weak instrument bias [33]. Furthermore, we were unable to use data from the multi-  
604 ancestry GWAS of smoking heaviness [45] as the NMR GWAS did not conduct similar  
605 analyses and was restricted to those of European descent and an assumption of MVMR is  
606 that all data included in an MVMR model are from the same underlying population [9].

607 Future work could focus on the inclusion of multiple ancestries if appropriate NMR GWAS  
608 become available to explore whether the findings generalise to non-European ancestries.  
609  
610 This work highlights the limited impact that long-term nicotine exposure via inhalation (e.g.,  
611 via smoking or potentially vaping) is likely to have on heart and lung health. Given that it will  
612 not be possible to explore the long-term effects of vaping for some years yet, and the  
613 impact of long-term nicotine use is usually confounded by smoking, this is an important  
614 addition to our knowledge with respect to the harms of vaping. However, there are many  
615 more potential health outcomes (e.g., the effects on cancer progression, mental health,  
616 sleep, perinatal outcomes etc.) which should be explored in future research. Additionally,  
617 the effect of vaping nicotine could be impacted by nicotine absorption potentially occurring  
618 by a different route to smoking (e.g., via oral mucosa absorption rather than lungs), or by  
619 the difference in vehicle-delivery (i.e., via liquid droplets of propylene glycol and glycerol  
620 rather than particulates) [46]. Furthermore, these findings cannot inform our understanding  
621 of non-nicotine e-cigarette vapour constituent exposure; further research is therefore  
622 needed to understand the health impact of long-term exposure to propylene glycol,  
623 vegetable glycerine and common e-liquid flavourings. Nevertheless, the findings support the  
624 safe long-term use of traditional pharmaceutical nicotine replacement therapies such as  
625 nicotine patches.

626

## 627 **Conclusions**

628 In conclusion, the present findings indicate that long-term nicotine use (via inhalation) when  
629 accounting for exposure to non-nicotine constituents of tobacco smoke may increase heart  
630 rate but does not increase risk of COPD or CHD and does not appear to adversely impact

631 lung function. We found that, aside from effects on heart rate (which were expected given  
632 our knowledge of effects of short-term nicotine use), there was no evidence to suggest that  
633 long-term nicotine exposure is responsible for the detrimental effects of smoking on the  
634 outcomes that were included in this analysis. Although further research is necessary to  
635 explore other health outcomes and triangulate these findings, our results support existing  
636 evidence which suggests nicotine use is not a major risk factor in the development of  
637 smoking-related disease.  
638



639

## Acknowledgements

640 We would like to thank Rachel Tyndale and her team for their support in interpreting the  
641 MVMR results relating to NMR and provision of summary statistics. We would also like to  
642 thank the GSCAN and ILCCO teams (including James McKay) for the provision of summary  
643 statistics. Quality Control filtering of the UK Biobank data was conducted by R. Mitchell, G.  
644 Hemani, T. Dudding, L. Corbin, S. Harrison, L. Paternoster as described in the published  
645 protocol (doi: 10.5523/bris.1ovaau5sxunp2cv8rcy88688v). The MRC IEU UK Biobank GWAS  
646 pipeline was developed by B. Elsworth, R. Mitchell, C. Raistrick, L. Paternoster, G. Hemani, T.  
647 Gaunt (doi: 10.5523/bris.pnoat8cxo0u52p6ynfaekeigi).

648

649

## Funding

650 JNK, RCR, MRM, ES, and AET are all members of the Medical Research Council (MRC)  
651 Integrative Epidemiology Unit at the University of Bristol (MC\_UU\_00032/01,  
652 MC\_UU\_00032/04, MC\_UU\_00032/07). REW is funded by the Norwegian South-Eastern  
653 Regional Health Authority (2020024). This work was supported by Cancer Research UK  
654 (grant number C18281/A29019). This work is supported by the National Institute for Health  
655 Research (NIHR) Biomedical Research Centre at University Hospitals Bristol NHS Foundation  
656 Trust and the University of Bristol. The views expressed in this publication are those of the  
657 authors and not necessarily those of the NHS, the NIHR or the Department of Health and  
658 Social Care.

659

## References

- 660 1. Das SK. Harmful health effects of cigarette smoking. *Mol Cell Biochem.* 2003;253(1-  
661 2):159-65. Epub 2003/11/19. doi: 10.1023/a:1026024829294. PubMed PMID: 14619966.
- 662 2. Action on Smoking and Health. Use of e-cigarettes (vapes) among adults in Great  
663 Britain. 2022. Available from: [https://ash.org.uk/uploads/Use-of-e-cigarettes-vapes-among-](https://ash.org.uk/uploads/Use-of-e-cigarettes-vapes-among-adults-in-Great-Britain-2022.pdf?v=1661865959)  
664 [adults-in-Great-Britain-2022.pdf?v=1661865959](https://ash.org.uk/uploads/Use-of-e-cigarettes-vapes-among-adults-in-Great-Britain-2022.pdf?v=1661865959).
- 665 3. Jackson SE, Hill E, Shahab L, Beard E, Michie S, Brown J. Prevalence and correlates of  
666 long-term e-cigarette and nicotine replacement therapy use: a prospective study in England.  
667 *BMJ Open.* 2019;9(10):e029252. Epub 2019/10/13. doi: 10.1136/bmjopen-2019-029252.  
668 PubMed PMID: 31604784; PubMed Central PMCID: PMC6797372.
- 669 4. Shahab L, Dobbie F, Hiscock R, McNeill A, Bauld L. Prevalence and Impact of Long-  
670 term Use of Nicotine Replacement Therapy in UK Stop-Smoking Services: Findings From the  
671 ELONS Study. *Nicotine Tob Res.* 2017;20(1):81-8. Epub 2016/09/25. doi:  
672 10.1093/ntr/ntw258. PubMed PMID: 27664995; PubMed Central PMCID: PMC5896546.
- 673 5. Lee PN, Fariss MW. A systematic review of possible serious adverse health effects of  
674 nicotine replacement therapy. *Arch Toxicol.* 2017;91(4):1565-94. Epub 2016/10/05. doi:  
675 10.1007/s00204-016-1856-y. PubMed PMID: 27699443; PubMed Central PMCID:  
676 PMC5364244.
- 677 6. Gvozdenović E, Malvisi L, Cinconze E, Vansteelandt S, Nakanwagi P, Aris E, et al.  
678 Causal inference concepts applied to three observational studies in the context of vaccine  
679 development: from theory to practice. *BMC Medical Research Methodology.* 2021;21(1):35.  
680 doi: 10.1186/s12874-021-01220-1.
- 681 7. Richmond RC, Davey Smith G. Mendelian Randomization: Concepts and Scope. *Cold*  
682 *Spring Harb Perspect Med.* 2022;12(1). Epub 2021/08/25. doi:  
683 10.1101/cshperspect.a040501. PubMed PMID: 34426474; PubMed Central PMCID:  
684 PMC8725623.
- 685 8. Sanderson E, Glymour MM, Holmes MV, Kang H, Morrison J, Munafò MR, et al.  
686 Mendelian randomization. *Nature Reviews Methods Primers.* 2022;2(1):6. doi:  
687 10.1038/s43586-021-00092-5.
- 688 9. Sanderson E, Davey Smith G, Windmeijer F, Bowden J. An examination of  
689 multivariable Mendelian randomization in the single-sample and two-sample summary data  
690 settings. *Int J Epidemiol.* 2019;48(3):713-27. Epub 2018/12/12. doi: 10.1093/ije/dyy262.  
691 PubMed PMID: 30535378; PubMed Central PMCID: PMC6734942.
- 692 10. Liu MZ, Jiang Y, Wedow R, Li Y, Brazel DM, Chen F, et al. Association studies of up to  
693 1.2 million individuals yield new insights into the genetic etiology of tobacco and alcohol  
694 use. *Nat Genet.* 2019;51(2):237-+. doi: 10.1038/s41588-018-0307-5. PubMed PMID:  
695 WOS:000457314300010.
- 696 11. Buchwald J, Chenoweth MJ, Palviainen T, Zhu G, Benner C, Gordon S, et al. Genome-  
697 wide association meta-analysis of nicotine metabolism and cigarette consumption measures  
698 in smokers of European descent. *Mol Psychiatry.* 2020. Epub 2020/03/12. doi:  
699 10.1038/s41380-020-0702-z. PubMed PMID: 32157176; PubMed Central PMCID:  
700 PMC67483250.
- 701 12. Benowitz NL, Hukkanen J, Jacob P, 3rd. Nicotine chemistry, metabolism, kinetics and  
702 biomarkers. *Handb Exp Pharmacol.* 2009;(192):29-60. Epub 2009/02/03. doi: 10.1007/978-  
703 3-540-69248-5\_2. PubMed PMID: 19184645; PubMed Central PMCID: PMC2953858.

- 704 13. Dempsey D, Tutka P, Jacob III P, Allen F, Schoedel K, Tyndale RF, et al. Nicotine  
705 metabolite ratio as an index of cytochrome P450 2A6 metabolic activity. *Clinical*  
706 *Pharmacology & Therapeutics*. 2004;76(1):64-72. doi:  
707 <https://doi.org/10.1016/j.clpt.2004.02.011>.
- 708 14. Carroll DM, Murphy SE, Benowitz NL, Strasser AA, Kotlyar M, Hecht SS, et al.  
709 Relationships between the Nicotine Metabolite Ratio and a Panel of Exposure and Effect  
710 Biomarkers: Findings from Two Studies of U.S. Commercial Cigarette Smokers. *Cancer*  
711 *Epidemiol Biomarkers Prev*. 2020;29(4):871-9. Epub 2020/02/14. doi: 10.1158/1055-  
712 9965.Epi-19-0644. PubMed PMID: 32051195; PubMed Central PMCID: PMCPMC7437528.
- 713 15. West R. Tobacco smoking: Health impact, prevalence, correlates and interventions.  
714 *Psychol Health*. 2017;32(8):1018-36. Epub 2017/05/30. doi:  
715 10.1080/08870446.2017.1325890. PubMed PMID: 28553727; PubMed Central PMCID:  
716 PMCPMC5490618.
- 717 16. Jayes L, Haslam PL, Gratziou CG, Powell P, Britton J, Vardavas C, et al. SmokeHaz:  
718 Systematic Reviews and Meta-analyses of the Effects of Smoking on Respiratory Health.  
719 *Chest*. 2016;150(1):164-79. Epub 2016/04/23. doi: 10.1016/j.chest.2016.03.060. PubMed  
720 PMID: 27102185.
- 721 17. Khan A, Shabbir K, Ansari JK, Zia N. Comparison of forced expiratory volume in one  
722 second (FEV1) among asymptomatic smokers and non-smokers. *J Pak Med Assoc*.  
723 2010;60(3):209-13. Epub 2010/03/17. PubMed PMID: 20225780.
- 724 18. Hammerton G, Munafò MR. Causal inference with observational data: the need for  
725 triangulation of evidence. *Psychological Medicine*. 2021;51(4):563-78. Epub 2021/03/08.  
726 doi: 10.1017/S0033291720005127.
- 727 19. Benowitz NL, Burbank AD. Cardiovascular toxicity of nicotine: Implications for  
728 electronic cigarette use. *Trends Cardiovasc Med*. 2016;26(6):515-23. Epub 2016/04/16. doi:  
729 10.1016/j.tcm.2016.03.001. PubMed PMID: 27079891; PubMed Central PMCID:  
730 PMCPMC4958544.
- 731 20. Royal College of Physicians. Nicotine without smoke: Tobacco harm reduction. .  
732 2016.
- 733 21. Ware JJ, Chen X, Vink J, Loukola A, Minica C, Pool R, et al. Genome-Wide Meta-  
734 Analysis of Cotinine Levels in Cigarette Smokers Identifies Locus at 4q13.2. *Sci Rep*.  
735 2016;6:20092. Epub 2016/02/03. doi: 10.1038/srep20092. PubMed PMID: 26833182;  
736 PubMed Central PMCID: PMCPMC4735517.
- 737 22. McKay JD, Hung RJ, Han Y, Zong X, Carreras-Torres R, Christiani DC, et al. Large-scale  
738 association analysis identifies new lung cancer susceptibility loci and heterogeneity in  
739 genetic susceptibility across histological subtypes. *Nat Genet*. 2017;49(7):1126-32. Epub  
740 2017/06/12. doi: 10.1038/ng.3892. PubMed PMID: 28604730.
- 741 23. Elsworth B, Mitchell, R., Raistrick, C., Paternoster, L., Hemani, G., Gaunt T. MRC IEU  
742 UK Biobank GWAS pipeline, version 2, 18/01/2019. *databris*. 2019. doi:  
743 10.5523/bris.pnoat8cxo0u52p6ynfaekeigi.
- 744 24. Mitchell R, Hemani G, Dudding T, Corbin L, Harrison S, Paternoster L. UK Biobank  
745 Genetic Data: MRC-IEU Quality Control, version 2 - Datasets - *data.bris*. *databris*. 2018. doi:  
746 doi:10.5523/bris.1ovaau5sxunp2cv8rcy88688v.
- 747 25. Hartwig FP, Tilling K, Davey Smith G, Lawlor DA, Borges MC. Bias in two-sample  
748 Mendelian randomization when using heritable covariable-adjusted summary associations.  
749 *International Journal of Epidemiology*. 2021;50(5):1639-50. doi: 10.1093/ije/dyaa266.

- 750 26. Jiang Y, Chen S, McGuire D, Chen F, Liu M, Iacono WG, et al. Proper conditional  
751 analysis in the presence of missing data: Application to large scale meta-analysis of tobacco  
752 use phenotypes. *PLOS Genetics*. 2018;14(7):e1007452. doi: 10.1371/journal.pgen.1007452.  
753 27. Yang J, Lee SH, Goddard ME, Visscher PM. GCTA: a tool for genome-wide complex  
754 trait analysis. *Am J Hum Genet*. 2011;88(1):76-82. Epub 2010/12/17. doi:  
755 10.1016/j.ajhg.2010.11.011. PubMed PMID: 21167468.
- 756 28. Allen NE, Sudlow C, Peakman T, Collins R, Biobank UK. UK biobank data: come and  
757 get it. *Sci Transl Med*. 2014;6(224):224ed4. Epub 2014/02/21. doi:  
758 10.1126/scitranslmed.3008601. PubMed PMID: 24553384.
- 759 29. Mitchell R, Hemani G, Dudding T, Corbin L, Harrison S, Paternoster L. UK Biobank  
760 Genetic Data: MRC-IEU Quality Control, version 2. 2019. doi:  
761 <https://doi.org/10.5523/bris.1ovaau5sxunp2cv8rcy88688v>.
- 762 30. Loh PR, Tucker G, Bulik-Sullivan BK, Vilhjalmsdottir BJ, Finucane HK, Salem RM, et al.  
763 Efficient Bayesian mixed-model analysis increases association power in large cohorts. *Nat*  
764 *Genet*. 2015;47(3):284-90. Epub 2015/02/03. doi: 10.1038/ng.3190. PubMed PMID:  
765 25642633; PubMed Central PMCID: PMC4342297.
- 766 31. Loh PR, Kichaev G, Gazal S, Schoech AP, Price AL. Mixed-model association for  
767 biobank-scale datasets. *Nat Genet*. 2018;50(7):906-8. doi: 10.1038/s41588-018-0144-6.  
768 PubMed PMID: WOS:000437224400002.
- 769 32. Sanderson E, Spiller W, Bowden J. Testing and correcting for weak and pleiotropic  
770 instruments in two-sample multivariable Mendelian randomization. *Stat Med*.  
771 2021;40(25):5434-52. Epub 2021/08/03. doi: 10.1002/sim.9133. PubMed PMID: 34338327;  
772 PubMed Central PMCID: PMC7979726.
- 773 33. Sanderson E, Spiller W, Bowden J. Testing and Correcting for Weak and Pleiotropic  
774 Instruments in Two-Sample Multivariable Mendelian Randomisation. *bioRxiv*.  
775 2020:2020.04.02.021980. doi: 10.1101/2020.04.02.021980.
- 776 34. Bowden J, Del Greco M F, Minelli C, Zhao Q, Lawlor DA, Sheehan NA, et al. Improving  
777 the accuracy of two-sample summary-data Mendelian randomization: moving beyond the  
778 NOME assumption. *International Journal of Epidemiology*. 2018;48(3):728-42. doi:  
779 10.1093/ije/dyy258.
- 780 35. Lawlor DA, Harbord RM, Sterne JAC, Timpson N, Davey Smith G. Mendelian  
781 randomization: Using genes as instruments for making causal inferences in epidemiology.  
782 *Statistics in Medicine*. 2008;27(8):1133-63. doi: <https://doi.org/10.1002/sim.3034>.
- 783 36. Rees JMB, Wood AM, Burgess S. Extending the MR-Egger method for multivariable  
784 Mendelian randomization to correct for both measured and unmeasured pleiotropy.  
785 *Statistics in Medicine*. 2017;36(29):4705-18. doi: 10.1002/sim.7492.
- 786 37. Skrivankova VW, Richmond RC, Woolf BAR, Davies NM, Swanson SA, VanderWeele  
787 TJ, et al. Strengthening the reporting of observational studies in epidemiology using  
788 mendelian randomisation (STROBE-MR): explanation and elaboration. *BMJ*.  
789 2021;375:n2233. doi: 10.1136/bmj.n2233.
- 790 38. King C, Mulugeta A, Nabi F, Walton R, Zhou A, Hyppönen E. Mendelian  
791 randomization case-control PheWAS in UK Biobank shows evidence of causality for smoking  
792 intensity in 28 distinct clinical conditions. *EClinicalMedicine*. 2020;26:100488. Epub  
793 2020/10/23. doi: 10.1016/j.eclinm.2020.100488. PubMed PMID: 33089118; PubMed Central  
794 PMCID: PMC7564324.
- 795 39. Fry A, Littlejohns TJ, Sudlow C, Doherty N, Adamska L, Sprosen T, et al. Comparison  
796 of Sociodemographic and Health-Related Characteristics of UK Biobank Participants With

- 797 Those of the General Population. *American Journal of Epidemiology*. 2017;186(9):1026-34.  
798 doi: 10.1093/aje/kwx246.
- 799 40. Bots SH, Peters SAE, Woodward M. Sex differences in coronary heart disease and  
800 stroke mortality: a global assessment of the effect of ageing between 1980 and 2010. *BMJ*  
801 *Global Health*. 2017;2(2):e000298. doi: 10.1136/bmjgh-2017-000298.
- 802 41. Donohue JF. Minimal Clinically Important Differences in COPD Lung Function. *COPD:*  
803 *Journal of Chronic Obstructive Pulmonary Disease*. 2005;2(1):111-24. doi: 10.1081/COPD-  
804 200053377.
- 805 42. Hypponen E, Mulugeta A, Zhou A, Santhanakrishnan VK. A data-driven approach for  
806 studying the role of body mass in multiple diseases: a phenome-wide registry-based case-  
807 control study in the UK Biobank. *Lancet Digit Health*. 2019;1(3):e116-e26. Epub 2019/07/01.  
808 doi: 10.1016/S2589-7500(19)30028-7. PubMed PMID: 33323262.
- 809 43. Peralta GP, Marcon A, Carsin A-E, Abramson MJ, Accordini S, Amaral AF, et al. Body  
810 mass index and weight change are associated with adult lung function trajectories: the  
811 prospective ECRHS study. *Thorax*. 2020;75(4):313-20. doi: 10.1136/thoraxjnl-2019-213880.
- 812 44. Gilbody J, Borges MC, Smith GD, Sanderson E. Multivariable MR can mitigate bias in  
813 two-sample MR using covariable-adjusted summary associations. *medRxiv*.  
814 2022:2022.07.19.22277803. doi: 10.1101/2022.07.19.22277803.
- 815 45. Saunders GRB, Wang X, Chen F, Jang S-K, Liu M, Wang C, et al. Genetic diversity fuels  
816 gene discovery for tobacco and alcohol use. *Nature*. 2022;612(7941):720-4. doi:  
817 10.1038/s41586-022-05477-4.
- 818 46. Farsalinos KE, Spyrou A, Tsimopoulou K, Stefopoulos C, Romagna G, Voudris V.  
819 Nicotine absorption from electronic cigarette use: comparison between first and new-  
820 generation devices. *Sci Rep*. 2014;4:4133. Epub 2014/02/27. doi: 10.1038/srep04133.  
821 PubMed PMID: 24569565; PubMed Central PMCID: PMC3935206.  
822
